# Supplementary material
Source: HighWire-hosted journal article supplement (https://erj.ersjournals.com/content/58/1/2002686)
Supplement: inline-supplementary-material-2 [file inline-supplementary-material-2.pdf]

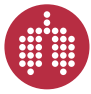

# Longitudinal course of clinical lung clearance index in children with cystic fibrosis

SHAREABLE PDF

Bettina S. Frauchiger<sup>1</sup>, Severin Binggeli<sup>1</sup>, Sophie Yammine<sup>1</sup>, Ben Spycher<sup>2</sup>, Linn Krüger<sup>1</sup>, Kathryn A. Ramsey<sup>1,3</sup> and Philipp Latzin<sup>1,3</sup>

<sup>1</sup>Pediatric Respiratory Medicine, Dept of Pediatrics, Inselspital, Bern University Hospital, University of Bern, Bern, Switzerland. <sup>2</sup>Institute of Social and Preventive Medicine, University of Bern, Bern, Switzerland. <sup>3</sup>These authors contributed equally.

Corresponding author: Philipp Latzin ([philipp.latzin@insel.ch](mailto:philipp.latzin@insel.ch))

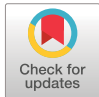

Shareable abstract (@ERSpublications)

The lung clearance index (LCI) is sensitive to assess lung disease progression in children with CF in routine clinical care. An increased change in LCI should prompt further diagnostic intervention to determine the underlying pathological process. <https://bit.ly/3ae9Rhp>

**Cite this article as:** Frauchiger BS, Binggeli S, Yammine S, *et al.* Longitudinal course of clinical lung clearance index in children with cystic fibrosis. *Eur Respir J* 2021; 58: 2002686 [DOI: 10.1183/13993003.02686-2020].

This single-page version can be shared freely online.

Copyright ©ERS 2021. For reproduction rights and permissions contact [permissions@ersnet.org](mailto:permissions@ersnet.org)

This article has supplementary material available from [erj.ersjournals.com](http://erj.ersjournals.com)

This article has an editorial commentary: <https://doi.org/10.1183/13993003.00236-2021>

Received: 8 July 2020  
Accepted: 7 Dec 2020

## Abstract

**Background** Although the lung clearance index (LCI) is a sensitive marker of small airway disease in individuals with cystic fibrosis (CF), less is known about longitudinal changes in LCI during routine clinical surveillance. Here, our objectives were to describe the longitudinal course of LCI in children with CF during routine clinical surveillance and assess influencing factors.

**Methods** Children with CF aged 3–18 years performed LCI measurements every 3 months as part of routine clinical care between 2011 and 2018. We recorded clinical data at every visit. We used a multilevel mixed effect model to determine changes in LCI over time and identify clinical factors that influence LCI course.

**Results** We collected LCI measurements from 1204 visits (3603 trials) in 78 participants, of which 907 visits had acceptable LCI data. The average unadjusted increase in LCI for the entire population was 0.29 (95% CI 0.20–0.38) LCI units·year<sup>-1</sup>. The increase in LCI was more pronounced in adolescence (0.41 (95% CI 0.27–0.54) LCI units·year<sup>-1</sup>). Colonisation with either *Pseudomonas aeruginosa* or *Aspergillus fumigatus*, pulmonary exacerbations, CF-related diabetes and bronchopulmonary aspergillosis were associated with a higher increase in LCI over time. Adjusting for clinical risk factors reduced the increase in LCI over time to 0.24 (95% CI 0.16–0.33) LCI units·year<sup>-1</sup>.

**Conclusions** LCI measured during routine clinical surveillance is associated with underlying disease progression in children with CF. An increased change in LCI over time should prompt further diagnostic intervention.
